# Supplementary material for: σ-Hole interactions in organometallic catalysts: the case of methyltrioxorhenium(vii)
Source: Royal Society of Chemistry journal article supplement (doi:10.1039/d2dt03819f), 2022-12-26
Supplement: d2dt03819f1.pdf [file d2dt03819f1.pdf]

## **ELECTRONIC SUPPLEMENTARY INFORMATION**

# **$\sigma$ -Hole interactions in organometallic catalysts: the case of methyltrioxorhenium(VII)**

**Miriam Calabrese,<sup>a</sup> Andrea Pizzi,<sup>a</sup> Andrea Daolio,<sup>a</sup> Antonio Frontera,<sup>b</sup> and  
Giuseppe Resnati<sup>\*a</sup>**

*<sup>a</sup> NFMLab, Dept- Chemistry, Materials, and Chemical Engineering “Giulio Natta”,  
Politecnico di Milano, via L. Mancinelli 7; I-20131 Milano, Italy*

*<sup>b</sup> Dept. Chemistry, Universitat de les Illes Balears, Crta. de Valldemossa km 7.5, 07122  
Palma de Mallorca (Balears)*

**Table of Content:**

|                                                  |           |
|--------------------------------------------------|-----------|
| <b>S.1. Synthesis and Characterization .....</b> | <b>3</b>  |
| <b>S.2. Crystallographic Details.....</b>        | <b>6</b>  |
| <b>S.3. CSD Surveys.....</b>                     | <b>11</b> |
| <b>S.4. Computational Data.....</b>              | <b>12</b> |
| <b>S.5. References.....</b>                      | <b>16</b> |

## S.1. Synthesis and Characterization

### S.1.1. Synthesis of methyltrioxorhenium·1,4-diazabicyclo[2.2.2]octane adduct (3b).

0.05 mmol of 1,4-diazabicyclo[2.2.2]octane (**2b**) were added to a solution of  $\text{CH}_3\text{ReO}_3$  (**1**, 0.1 mmol) in dichloromethane (2 mL) inside a clear borosilicate vial. White crystals of **3b** suitable for single crystal X-Ray diffraction were obtained in 24 hours by slow evaporation of the solvent. FT-IR (selected bands,  $\text{cm}^{-1}$ ) 2962, 1644, 1469, 1358, 1325, 1056, 1001, 897, 839, 549.  $^{13}\text{C}$  NMR (400 MHz,  $\text{CDCl}_3$ ):  $\delta$  46.14 ( $\text{NC}$ ), 23.97 ( $\text{CH}_3$ ).  $^{13}\text{C}$  NMR (400 MHz,  $\text{CDCl}_3$ ) of a 1:5 solution of **3b** and **2b**:  $\delta$  45.98 ( $\text{NC}$ ), 21.14 ( $\text{CH}_3$ ).

### S.1.2. Synthesis of methyltrioxorhenium·[4,4'-bipyridine] 1,1'-dioxide adducts (3c).

0.05 mmol of [4,4'-bipyridine] 1,1'-dioxide (**2c**) were added to a solution of  $\text{CH}_3\text{ReO}_3$  (**1**, 0.1 mmol) in dichloromethane (2 mL) inside a clear borosilicate vial. White crystals of **3c** suitable for single crystal X-Ray diffraction were obtained in 24 hours by slow evaporation of the solvent. FT-IR (selected bands,  $\text{cm}^{-1}$ ) 2985, 2899, 1611, 1470, 1432, 1358, 1206, 995, 927, 570.  $^{13}\text{C}$  NMR (400 MHz,  $\text{CDCl}_3$ ):  $\delta$  140.8 ( $\text{NC}$ ), 134.2 ( $\text{NCCC}$ ), 123.4 ( $\text{NCC}$ ), 29.7 ( $\text{CH}_3$ ).

**S.1.3. Synthesis of methyltrioxorhenium-pyrazine N-oxide adduct (3d).** 0.1 mmol of pyrazine *N*-oxide were added to a solution of  $\text{CH}_3\text{ReO}_3$  (0.1 mmol) in dichloromethane (2 mL) inside a clear borosilicate vial. White crystals of **3d** suitable for single crystal X-Ray diffraction were obtained in 24 hours by slow evaporation of the solvent. FT-IR (selected bands,  $\text{cm}^{-1}$ ) 3114, 3090, 3035, 2389, 1610, 1462, 1443, 1312, 1200, 964, 926, 539.  $^{13}\text{C}$  NMR (400 MHz,  $\text{CDCl}_3$ ): 147.53 ( $\text{NC}$ ), 134.33 ( $\text{NC}$ ), 19.48 ( $\text{CH}_3$ ).

### S.1.4. Synthesis of 1,2-di(pyridine-4-yl)ethane·1,2-diiodotetrafluoroethane adduct.

0.1 mmol of 1,2-di(pyridine-4-yl)ethane were added to a solution of 1,2-diiodotetrafluoroethane (0.1 mmol in acetone (2 mL) inside a clear borosilicate vial. White crystals (elongated blocks) of the title adduct suitable for single crystal X-Ray diffraction were obtained in 24 hours by slow evaporation of the solvent. FT-IR (selected bands,  $\text{cm}^{-1}$ ) 2935, 1601, 1561, 1420, 1217, 1115, 1084, 999, 816, 697, 539.  $^{19}\text{F}$  NMR (400 MHz,  $\text{CDCl}_3\text{-d}_6$ ):  $\delta$  s -52.57 ( $\text{CF}_2$ )  $^{13}\text{C}$  NMR (400 MHz,  $\text{CDCl}_3\text{-d}_6$ ): 149.92 ( $\text{NC}$ ), 149.41( $\text{NCCC}$ ), 123.78 ( $\text{NCC}$ ), 94.91 (tt,  $^1J_{\text{C-F}}$  310 Hz,  $^2J_{\text{C-F}}$  40 Hz,  $\text{CF}_2$ ), 35.70 ( $\text{CH}_2$ ).

**Table S.1.**  $^{13}\text{C}$  NMR chemical shifts ( $\delta$ , ppm) of MTO in different nucleophilic solvents

| Solvents                           | $^{13}\text{C}$ NMR |
|------------------------------------|---------------------|
| Chloroform                         | 19.04               |
| Ethylene carbonate <sup>a</sup>    | 19.48               |
| Acetone                            | 19.56               |
| Acetonitrile                       | 21.34               |
| N,N-Dimethylformamide <sup>a</sup> | 21.49               |
| Dimethylsulphoxide                 | 25.38               |
| Pyridine                           | 26.07               |

<sup>a</sup> Non-deuterated solvent was used.

### S.1.5. Matere, halogen, and hydrogen bonds: competitive co-crystallization experiments

Any competitive co-crystallization experiment was performed in two different solvents (acetone and dichloromethane or methanol and methanol/dichloromethane 1:1). The outcomes of these experiments were established by SC-XRD analyses carried out on the first crystals formed in each experiment. In each experiment three compounds were present in the solution (specifically, **1** i.e. the MaB donor, the HaB or HB donor, and **2a,c** i.e. the Lewis base). Their molar ratio was established in order to have equimolar amounts of MaB donor sites (**1** was assumed as a monodentate MaB donor), HaB or HB donor sites, and basic sites. All experiments were performed by using 0.03 mmol of **1**.

The tables below summarize the results obtained for the two investigated Lewis bases (i.e., 1,2-di(pyridin-4-yl)ethane (**2a**) and [4,4'-bipyridine]1,1'-dioxide (**2c**)).

**Table S.2.** Competitive co-crystallization experiments involving MTO (**1**), 1,2-di(pyridin-4-yl)ethane (**2a**), and four different HaB or HB donors in two different solvents.

| HaB or HB donor             | Formed adduct (prevailing interaction) |                 |
|-----------------------------|----------------------------------------|-----------------|
|                             | Acetone                                | Dichloromethane |
| 1,2-Diiodotetrafluoroethane | <b>3a</b> (MaB)                        | <b>3a</b> (MaB) |
| 1,4-Diodotetrafluorobenzene | <b>3a</b> (MaB)                        | <b>3a</b> (MaB) |
| 1,4-Dihydroxybenzene        | <b>3a</b> (MaB)                        | <b>3a</b> (MaB) |
| 4-Cyanophenol               | <b>3a</b> (MaB)                        | <b>3a</b> (MaB) |

**Table S.3. Competitive co-crystallization experiments involving MTO (1), 4,4'-bipyridine-1,1'-dioxide (2c), and two HB donors in two different solvents.**

| HB donor          | Formed adduct (prevailing interaction) |                              |
|-------------------|----------------------------------------|------------------------------|
|                   | Methanol                               | Methanol/dichloromethane 1:1 |
| Pyromellitic acid | 3c (MaB)                               | 3c (MaB)                     |
| Tartaric acid     | 2c·Tartaric acid (HB)                  | 2c·Tartaric acid (HB)        |

**Table S.4. Nc values for adduct which formed/might be formed in competitive co-crystallization experiments.**

| Adduct (Refcode)                            | Nc value |
|---------------------------------------------|----------|
| 3a (this paper)                             | 0.67     |
| 2a·1,2-Diiodotetrafluoroethane (this paper) | 0.76     |
| 2a·1,4-Diiodotetrafluorobenzene (MEKWOO)    | 0.75     |
| 2a·1,4-Dihydroxybenzene (MEKWUU)            | 0.63     |
| 2a·4-Cyanophenol (KIHYES)                   | 0.64     |
| 3c (this paper)                             | 0.63     |
| 2c·Pyromellitic acid (HOPKIH)               | 0.57     |
| 2c·Tartaric acid (KIMBEQ)                   | 0.54     |

## S.2. Crystallographic Details.

**Table S.5.** Crystal data and structure refinement for **3a**.

|                                             |                                                                               |
|---------------------------------------------|-------------------------------------------------------------------------------|
| Identification code                         | <b>3a</b>                                                                     |
| Empirical formula                           | C <sub>14</sub> H <sub>18</sub> N <sub>2</sub> O <sub>6</sub> Re <sub>2</sub> |
| Formula weight                              | 682.70                                                                        |
| Temperature/K                               | 296 K                                                                         |
| Crystal system                              | triclinic                                                                     |
| Space group                                 | P-1                                                                           |
| a/Å                                         | 6.02510(10)                                                                   |
| b/Å                                         | 6.7106(2)                                                                     |
| c/Å                                         | 11.4878(3)                                                                    |
| α/°                                         | 79.5150(10)                                                                   |
| β/°                                         | 76.4570(10)                                                                   |
| γ/°                                         | 77.5250(10)                                                                   |
| Volume/Å <sup>3</sup>                       | 436.655(19)                                                                   |
| Z                                           | 1                                                                             |
| ρ <sub>calc</sub> /g/cm <sup>3</sup>        | 2.596                                                                         |
| μ/mm <sup>-1</sup>                          | 13.880                                                                        |
| F(000)                                      | 314.0                                                                         |
| Crystal size/mm <sup>3</sup>                | 0.06 × 0.04 × 0.02                                                            |
| Radiation                                   | MoKα (λ = 0.71073)                                                            |
| 2θ range for data collection/°              | 6.826 to 61.13                                                                |
| Index ranges                                | -8 ≤ h ≤ 8, -9 ≤ k ≤ 9, -16 ≤ l ≤ 16                                          |
| Reflections collected                       | 9026                                                                          |
| Independent reflections                     | 2684 [R <sub>int</sub> = 0.0364, R <sub>sigma</sub> = 0.0300]                 |
| Data/restraints/parameters                  | 2684/0/111                                                                    |
| Goodness-of-fit on F <sup>2</sup>           | 1.044                                                                         |
| Final R indexes [I ≥ 2σ (I)]                | R <sub>1</sub> = 0.0179, wR <sub>2</sub> = 0.0429                             |
| Final R indexes [all data]                  | R <sub>1</sub> = 0.0200, wR <sub>2</sub> = 0.0438                             |
| Largest diff. peak/hole / e Å <sup>-3</sup> | 0.72/-0.80                                                                    |
| CCDC number                                 | 2174961                                                                       |

**Table S.6.** Crystal data and structure refinement for **3b**.

|                                                |                                                               |
|------------------------------------------------|---------------------------------------------------------------|
| Identification code                            | <b>3b</b>                                                     |
| Empirical formula                              | $C_8H_{18}N_2O_6Re_2$                                         |
| Formula weight                                 | 610.64                                                        |
| Temperature/K                                  | 296 K                                                         |
| Crystal system                                 | monoclinic                                                    |
| Space group                                    | $P2_1/n$                                                      |
| $a/\text{\AA}$                                 | 9.7251(9)                                                     |
| $b/\text{\AA}$                                 | 9.6283(9)                                                     |
| $c/\text{\AA}$                                 | 31.118(3)                                                     |
| $\alpha/^\circ$                                | 90                                                            |
| $\beta/^\circ$                                 | 96.230(5)                                                     |
| $\gamma/^\circ$                                | 90                                                            |
| Volume/ $\text{\AA}^3$                         | 2896.5(5)                                                     |
| Z                                              | 8                                                             |
| $\rho_{\text{calc}}/\text{g/cm}^3$             | 2.801                                                         |
| $\mu/\text{mm}^{-1}$                           | 16.720                                                        |
| F(000)                                         | 2224.0                                                        |
| Crystal size/ $\text{mm}^3$                    | $0.06 \times 0.04 \times 0.03$                                |
| Radiation                                      | MoK $\alpha$ ( $\lambda = 0.71073$ )                          |
| 2 $\theta$ range for data collection/ $^\circ$ | 2.634 to 52.132                                               |
| Index ranges                                   | $-11 \leq h \leq 11, -11 \leq k \leq 11, -37 \leq l \leq 37$  |
| Reflections collected                          | 32530                                                         |
| Independent reflections                        | 5361 [ $R_{\text{int}} = 0.1058, R_{\text{sigma}} = 0.0662$ ] |
| Data/restraints/parameters                     | 5361/0/323                                                    |
| Goodness-of-fit on $F^2$                       | 1.076                                                         |
| Final R indexes [ $I \geq 2\sigma(I)$ ]        | $R_1 = 0.0528, wR_2 = 0.0950$                                 |
| Final R indexes [all data]                     | $R_1 = 0.0851, wR_2 = 0.1043$                                 |
| Largest diff. peak/hole / $e \text{\AA}^{-3}$  | 2.21/-2.74                                                    |
| CCDC number                                    | 2174970                                                       |

**Table S.7.** Crystal data and structure refinement for **3c**.

|                                             |                                                                               |
|---------------------------------------------|-------------------------------------------------------------------------------|
| Identification code                         | <b>3c</b>                                                                     |
| Empirical formula                           | C <sub>12</sub> H <sub>14</sub> N <sub>2</sub> O <sub>8</sub> Re <sub>2</sub> |
| Formula weight                              | 686.65                                                                        |
| Temperature/K                               | 296 K                                                                         |
| Crystal system                              | monoclinic                                                                    |
| Space group                                 | C2/c                                                                          |
| a/Å                                         | 19.6709(19)                                                                   |
| b/Å                                         | 8.1455(7)                                                                     |
| c/Å                                         | 10.5288(9)                                                                    |
| α/°                                         | 90                                                                            |
| β/°                                         | 103.923(7)                                                                    |
| γ/°                                         | 90                                                                            |
| Volume/Å <sup>3</sup>                       | 1637.5(3)                                                                     |
| Z                                           | 4                                                                             |
| ρ <sub>calc</sub> /cm <sup>3</sup>          | 2.785                                                                         |
| μ/mm <sup>-1</sup>                          | 14.815                                                                        |
| F(000)                                      | 1256.0                                                                        |
| Crystal size/mm <sup>3</sup>                | 0.06 × 0.04 × 0.02                                                            |
| Radiation                                   | MoKα (λ = 0.71073)                                                            |
| 2θ range for data collection/°              | 7.04 to 69.43                                                                 |
| Index ranges                                | -31 ≤ h ≤ 30, -12 ≤ k ≤ 12, -14 ≤ l ≤ 16                                      |
| Reflections collected                       | 18664                                                                         |
| Independent reflections                     | 3291 [R <sub>int</sub> = 0.0479, R <sub>sigma</sub> = 0.0303]                 |
| Data/restraints/parameters                  | 3291/0/110                                                                    |
| Goodness-of-fit on F <sup>2</sup>           | 1.038                                                                         |
| Final R indexes [I ≥ 2σ (I)]                | R <sub>1</sub> = 0.0224, wR <sub>2</sub> = 0.0522                             |
| Final R indexes [all data]                  | R <sub>1</sub> = 0.0340, wR <sub>2</sub> = 0.0561                             |
| Largest diff. peak/hole / e Å <sup>-3</sup> | 0.83/-1.16                                                                    |
| CCDC number                                 | 2174969                                                                       |



**Table S.8.** Crystal data and structure refinement for **3d**.

|                                             |                                                                |
|---------------------------------------------|----------------------------------------------------------------|
| Identification code                         | <b>3d</b>                                                      |
| Empirical formula                           | C <sub>5</sub> H <sub>7</sub> N <sub>2</sub> O <sub>4</sub> Re |
| Formula weight                              | 345.33                                                         |
| Temperature/K                               | 100 K                                                          |
| Crystal system                              | monoclinic                                                     |
| Space group                                 | P2 <sub>1</sub> /c                                             |
| a/Å                                         | 9.0455(5)                                                      |
| b/Å                                         | 10.9263(6)                                                     |
| c/Å                                         | 8.6505(5)                                                      |
| α/°                                         | 90                                                             |
| β/°                                         | 110.156(2)                                                     |
| γ/°                                         | 90                                                             |
| Volume/Å <sup>3</sup>                       | 802.60(8)                                                      |
| Z                                           | 4                                                              |
| ρ <sub>calc</sub> /g/cm <sup>3</sup>        | 2.858                                                          |
| μ/mm <sup>-1</sup>                          | 15.116                                                         |
| F(000)                                      | 632.0                                                          |
| Crystal size/mm <sup>3</sup>                | 0.06 × 0.04 × 0.03                                             |
| Radiation                                   | MoKα (λ = 0.71073)                                             |
| 2θ range for data collection/°              | 6.076 to 61.28                                                 |
| Index ranges                                | -12 ≤ h ≤ 12, -15 ≤ k ≤ 15, -12 ≤ l ≤ 12                       |
| Reflections collected                       | 16559                                                          |
| Independent reflections                     | 2464 [R <sub>int</sub> = 0.0393, R <sub>sigma</sub> = 0.0276]  |
| Data/restraints/parameters                  | 2464/0/110                                                     |
| Goodness-of-fit on F <sup>2</sup>           | 1.048                                                          |
| Final R indexes [I ≥ 2σ (I)]                | R <sub>1</sub> = 0.0234, wR <sub>2</sub> = 0.0656              |
| Final R indexes [all data]                  | R <sub>1</sub> = 0.0245, wR <sub>2</sub> = 0.0664              |
| Largest diff. peak/hole / e Å <sup>-3</sup> | 2.14/-1.83                                                     |
| CCDC number                                 | 2174971                                                        |

**Table S.9.** Crystal data and structure refinement for adduct **2a·1,2-diiodotetrafluoroethane**.

|                                             |                                                                              |
|---------------------------------------------|------------------------------------------------------------------------------|
| Identification code                         | <b>2a·1,2-diiodotetrafluoroethane</b>                                        |
| Empirical formula                           | C <sub>13</sub> H <sub>12</sub> F <sub>4</sub> I <sub>2</sub> N <sub>2</sub> |
| Formula weight                              | 526.05                                                                       |
| Temperature/K                               | 296 K                                                                        |
| Crystal system                              | triclinic                                                                    |
| Space group                                 | P-1                                                                          |
| a/Å                                         | 6.6506(7)                                                                    |
| b/Å                                         | 7.5300(8)                                                                    |
| c/Å                                         | 9.1546(10)                                                                   |
| α/°                                         | 94.188(6)                                                                    |
| β/°                                         | 96.753(7)                                                                    |
| γ/°                                         | 105.647(7)                                                                   |
| Volume/Å <sup>3</sup>                       | 435.76(8)                                                                    |
| Z                                           | 1                                                                            |
| ρ <sub>calc</sub> /g/cm <sup>3</sup>        | 2.005                                                                        |
| μ/mm <sup>-1</sup>                          | 3.640                                                                        |
| F(000)                                      | 246.0                                                                        |
| Crystal size/mm <sup>3</sup>                | 0.06 × 0.04 × 0.03                                                           |
| Radiation                                   | MoKα (λ = 0.71073)                                                           |
| 2θ range for data collection/°              | 5.652 to 57.11                                                               |
| Index ranges                                | -8 ≤ h ≤ 8, -10 ≤ k ≤ 10, -12 ≤ l ≤ 12                                       |
| Reflections collected                       | 7820                                                                         |
| Independent reflections                     | 2153 [R <sub>int</sub> = 0.0233, R <sub>sigma</sub> = 0.0226]                |
| Data/restraints/parameters                  | 2153/261/208                                                                 |
| Goodness-of-fit on F <sup>2</sup>           | 1.034                                                                        |
| Final R indexes [I ≥ 2σ (I)]                | R <sub>1</sub> = 0.0350, wR <sub>2</sub> = 0.0950                            |
| Final R indexes [all data]                  | R <sub>1</sub> = 0.0540, wR <sub>2</sub> = 0.1055                            |
| Largest diff. peak/hole / e Å <sup>-3</sup> | 1.04/-0.43                                                                   |
| CCDC number                                 | 2208886                                                                      |

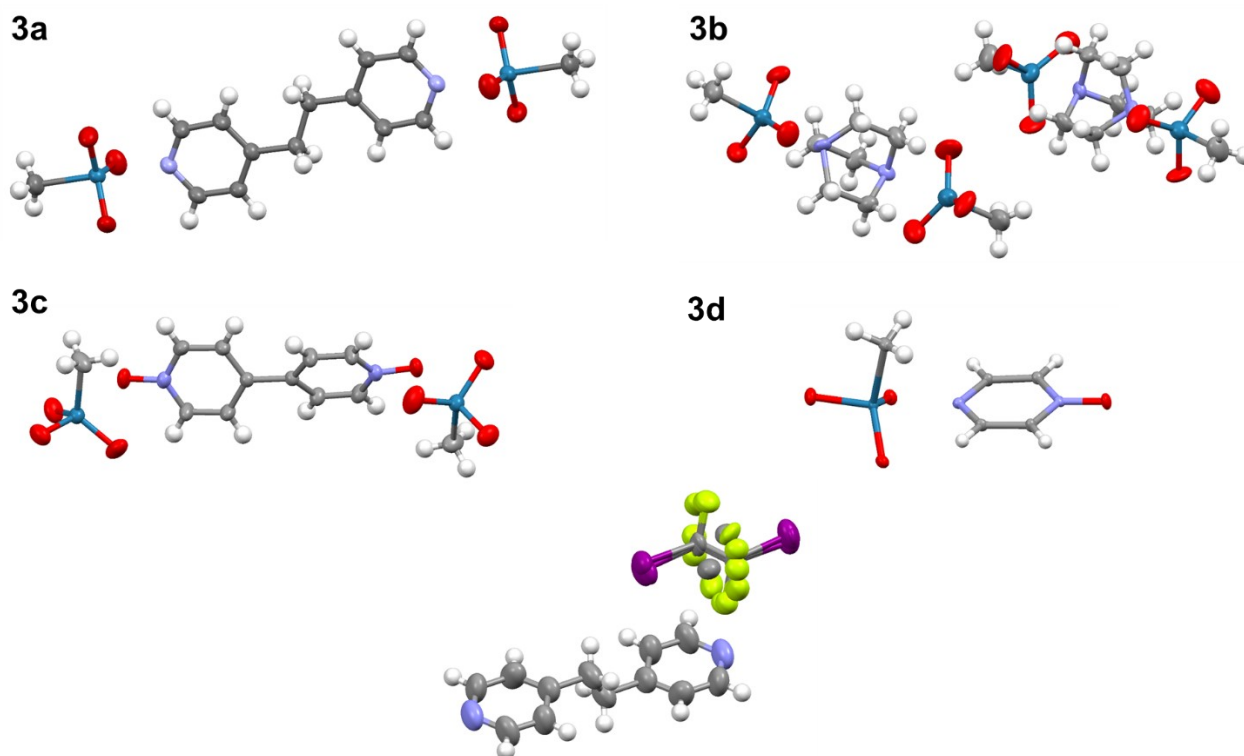

**2a·1,2-diiodotetrafluoroethane**

**Figure S1:** ADPs for each crystal structure reported in this work. Colour code: whitish, hydrogen; grey, carbon; indigo, nitrogen; red, oxygen; navy, rhenium; purple, iodine; yellow, fluorine.

### S.3. CSD Surveys

**Table S.6.** Hits in the Cambridge Structural Database (CSD) containing methyltrioxorhenium. The search is set up with rhenium bound to three oxygen atoms by “double bond” and to a methyl group by “single bound”. In blue, hits displaying a contact between the rhenium atom and a nucleophile (nucleophile=N, P, O, S, Se, F, Cl, Br, I) shorter than the sum of the respective van der Waals radii. According to Batsanov,<sup>[1]</sup> the crystallographic vdW radius of rhenium was set to 205 pm.

|        |        |          |        |          |
|--------|--------|----------|--------|----------|
| APAZOH | BUCQEW | KUHPUA01 | TAHWAC | VUFQET   |
| APAZUN | BUCQIA | NXSAL    | TAHWEG | VUFQIX   |
| APIZIJ | ECIYIY | NEXSEP   | TAHWIK | VUKFUE   |
| BOTBIW | KATREC | NXSIT    | TAHWOQ | XANKIG   |
| BOTBOC | KAZNII | NEXSOZ   | TAHWUW | XODMIN   |
| BOTBUI | KELZAC | NXSUF    | TAHXAD | YIDKAZ   |
| BOTCAP | KELZEG | NEZWOE   | TAHXEH | YIFSEL   |
| BOWHEB | KEXSOV | NIFZIL   | TULKIV | YOXVAI01 |
| BUCQAS | KUHPUA | PELFAP   | VOKHIO | YOXVAI02 |

## S.4. Computational Data

The energetic features of the adducts analyzed in this work were calculated at the PBE0<sup>[2]</sup>-D3<sup>[3]</sup>/def2-TZVP<sup>[4]</sup> level of theory using either the crystallographic coordinates or fully optimized geometries. This level of theory has been used before<sup>[5,6,7]</sup> to analyze similar interactions and it has been proved to provide results similar to high level ab initio methods.<sup>[8]</sup> The GAUSSIAN-16 program has been used for the energetic calculations and NBO analysis.<sup>[9]</sup> The basis set superposition error for the calculation of interaction energies has been corrected using the counterpoise method.<sup>[10]</sup> Molecular electrostatic potential (MEP) surfaces have been computed at the same level of theory and represented using several isovalues of electron density to map the electrostatic potential. The QTAIM analysis<sup>[11]</sup> has been performed using the AIMAll program at the same level of theory.<sup>[12]</sup>

In order to assess the nature of interactions in terms of being attractive or repulsive and revealed them in real space,<sup>[13]</sup> we have used NCIPLOT index, which is a method for plotting non-covalent interaction regions,<sup>[14]</sup> based on the NCI (Non-Covalent Interaction) visualization index derived from the electronic density.<sup>[15]</sup> The reduced density gradient (RDG), coming from the density and its first derivative, is plotted as a function of the density (mapped as isosurfaces) over the assembly of interest. The sign of the second Hessian eigenvalue times the electron density [i.e.  $\text{sign}(\lambda_2)\rho$  in atomic units] enables the identification of attractive/stabilizing (blue-green coloured isosurfaces) or repulsive (yellow-red coloured isosurfaces) interactions using 3D-Plots. For the plots shown in Figures 3 and 4 of the main text the NCIPLOT index parameters are: RGD = 0.45;  $\rho$  cut off = 0.04 a.u.; color range:  $-0.03 \text{ a.u.} \leq \text{sign}(\lambda_2)\rho \leq 0.03 \text{ a.u.}$

### S.4.1. Cartesian Coordinates

#### 1·Acetonitrile adduct (Figure 3a)

|    |             |             |             |
|----|-------------|-------------|-------------|
| Re | 0.00000000  | 0.00000000  | 0.61273592  |
| O  | 0.00000000  | 1.67026612  | 0.28869327  |
| O  | 1.44649289  | -0.83513306 | 0.28869327  |
| O  | -1.44649289 | -0.83513306 | 0.28869327  |
| C  | 0.00000000  | 0.00000000  | 2.68853924  |
| H  | 0.00000000  | -1.03100517 | 3.04697827  |
| H  | 0.89287667  | 0.51550258  | 3.04697827  |
| H  | -0.89287667 | 0.51550258  | 3.04697827  |
| C  | 0.00000000  | 0.00000000  | -3.27455787 |
| C  | 0.00000000  | 0.00000000  | -4.72146674 |
| H  | -0.88852699 | -0.51299129 | -5.09244566 |
| H  | 0.00000000  | 1.02598259  | -5.09244566 |
| H  | 0.88852699  | -0.51299129 | -5.09244566 |
| N  | 0.00000000  | 0.00000000  | -2.12893113 |

#### 2· Pyridine adduct (Figure 3b)

|    |             |            |             |
|----|-------------|------------|-------------|
| Re | -0.07915156 | 0.98747801 | 0.00000000  |
| O  | 1.62714530  | 0.86504020 | 0.00000000  |
| O  | -0.91751984 | 0.67119458 | 1.45079402  |
| O  | -0.91751984 | 0.67119458 | -1.45079402 |
| C  | -0.21525857 | 3.07231888 | 0.00000000  |
| H  | -1.26577981 | 3.36997329 | 0.00000000  |
| H  | 0.27575003  | 3.46888571 | 0.89108449  |

|   |             |             |             |
|---|-------------|-------------|-------------|
| H | 0.27575003  | 3.46888571  | -0.89108449 |
| C | 1.32432911  | -2.07347167 | 0.00000000  |
| C | 1.46424615  | -3.45119304 | 0.00000000  |
| C | 0.32155825  | -4.23398955 | 0.00000000  |
| C | -0.91751984 | -3.61217999 | 0.00000000  |
| C | -0.96369677 | -2.22978967 | 0.00000000  |
| N | 0.13547443  | -1.48072195 | 0.00000000  |
| H | 0.39444840  | -5.31558610 | 0.00000000  |
| H | 2.17955100  | -1.40559956 | 0.00000000  |
| H | 2.45214172  | -3.89426291 | 0.00000000  |
| H | -1.83643713 | -4.18468659 | 0.00000000  |
| H | -1.90617283 | -1.69301140 | 0.00000000  |

### 3a (Figure 4)

|    |             |             |             |
|----|-------------|-------------|-------------|
| N  | 4.72860840  | 2.42503659  | 7.39687853  |
| C  | 6.03903502  | 3.91147204  | 9.37805544  |
| C  | 6.79183118  | 4.72171552  | 10.40526298 |
| H  | 6.99033348  | 5.59244369  | 10.02622083 |
| H  | 7.63738134  | 4.28215515  | 10.58590682 |
| C  | 6.56231133  | 3.79035974  | 8.09463111  |
| H  | 7.36445470  | 4.20822076  | 7.87869047  |
| C  | 5.89388882  | 3.05417298  | 7.14434495  |
| H  | 6.26140599  | 2.98715042  | 6.29302400  |
| C  | 4.22927562  | 2.53417404  | 8.62697809  |
| H  | 3.42666325  | 2.10552573  | 8.81830909  |
| C  | 4.84520473  | 3.25229578  | 9.63275721  |
| H  | 4.46094153  | 3.29415176  | 10.47859060 |
| N  | 8.12639083  | 7.21897384  | 14.72482560 |
| C  | 6.81596421  | 5.73253839  | 12.74364869 |
| C  | 6.06316929  | 4.92225611  | 11.71653331 |
| H  | 5.86466575  | 4.05156674  | 12.09548330 |
| H  | 5.21761789  | 5.36185529  | 11.53579730 |
| C  | 6.29268790  | 5.85365069  | 14.02707302 |
| H  | 5.49055305  | 5.43569788  | 14.24297489 |
| C  | 6.96111041  | 6.58983745  | 14.97735918 |
| H  | 6.59359324  | 6.65686001  | 15.82868012 |
| C  | 8.62572485  | 7.10979760  | 13.49481819 |
| H  | 9.42823635  | 7.53847637  | 13.30339287 |
| C  | 8.00969610  | 6.39166752  | 12.48903690 |
| H  | 8.39405770  | 6.34985868  | 11.64311353 |
| Re | 3.51895528  | 1.22067299  | 5.64139720  |
| O  | 5.11089647  | 0.80862779  | 5.17611570  |
| O  | 2.82787000  | 0.43371654  | 6.98726656  |
| O  | 2.94614017  | 2.76810201  | 5.22840666  |
| C  | 2.50889164  | 0.14453875  | 4.16096723  |
| H  | 1.57160880  | 0.34775745  | 4.20096243  |
| H  | 2.63922699  | -0.79566061 | 4.30364473  |
| H  | 2.85250115  | 0.38799059  | 3.29799257  |
| Re | 9.33604394  | 8.42333744  | 16.48030693 |
| O  | 7.74400313  | 8.83537431  | 16.94558625 |
| O  | 10.02702960 | 9.21028556  | 15.13443540 |
| O  | 9.90885906  | 6.87590843  | 16.89329747 |
| C  | 10.34610759 | 9.49947168  | 17.96073690 |
| H  | 11.28339166 | 9.29621418  | 17.92083386 |
| H  | 10.21577348 | 10.43963224 | 17.81815155 |
| H  | 10.00249808 | 9.25601984  | 18.82371155 |

### 3b (Figure 4)

|   |             |            |             |
|---|-------------|------------|-------------|
| N | 0.59732511  | 1.48317217 | 15.03442904 |
| N | 0.89333128  | 3.71850074 | 16.26854120 |
| C | 0.49796584  | 3.94392922 | 14.86972602 |
| H | 1.18240733  | 4.45706904 | 14.41261051 |
| H | -0.33025413 | 4.44817667 | 14.83934071 |
| C | -0.15415760 | 2.88269635 | 16.92193213 |
| H | -1.00060313 | 3.35574554 | 16.90954370 |
| H | 0.08850857  | 2.72158403 | 17.84654009 |
| C | -0.30398762 | 1.56085214 | 16.20124498 |
| H | -0.10155244 | 0.83628012 | 16.81293500 |
| H | -1.22194902 | 1.45747049 | 15.90612099 |
| C | 0.30498222  | 2.57721805 | 14.15788042 |
| H | -0.61098940 | 2.50328146 | 13.84642857 |

|    |             |             |             |
|----|-------------|-------------|-------------|
| H  | 0.88813702  | 2.53291896  | 13.38351423 |
| C  | 2.00990775  | 1.62983912  | 15.51260959 |
| H  | 2.61563156  | 1.61783078  | 14.75524624 |
| H  | 2.23773417  | 0.88843130  | 16.09522246 |
| C  | 2.16052932  | 2.95342908  | 16.27505349 |
| H  | 2.42141656  | 2.76976065  | 17.19142767 |
| H  | 2.85999971  | 3.48465160  | 15.86464771 |
| Re | 1.13817987  | 5.89686691  | 17.38161103 |
| O  | -0.54123737 | 5.95183498  | 17.11009144 |
| O  | 1.68390490  | 4.95959928  | 18.69482273 |
| O  | 2.19388143  | 6.14134293  | 16.07651992 |
| C  | 1.32600842  | 7.80088147  | 18.24482551 |
| H  | 2.25560134  | 7.98012989  | 18.42213472 |
| H  | 0.98724255  | 8.46261613  | 17.63728622 |
| H  | 0.83320000  | 7.83243174  | 19.06445415 |
| Re | 0.30826575  | -0.60529073 | 13.84284056 |
| O  | -1.24938989 | 0.01878126  | 13.52198607 |
| O  | 1.62792464  | -0.01303107 | 12.92780859 |
| O  | 0.63035750  | -1.27613554 | 15.34306897 |
| C  | 0.05455404  | -2.41518763 | 12.84083805 |
| H  | -0.68467724 | -2.89225624 | 13.22387038 |
| H  | 0.85313942  | -2.94105451 | 12.92294649 |
| H  | -0.12173845 | -2.24436639 | 11.91200042 |

### 3c (Figure 4)

|    |             |            |             |
|----|-------------|------------|-------------|
| Re | 6.46772074  | 6.19366638 | 1.50827852  |
| C  | 7.36328400  | 6.50708406 | 7.14501190  |
| C  | 5.62548654  | 6.34374887 | 5.50086358  |
| H  | 4.77053715  | 6.06697389 | 5.26146437  |
| C  | 6.10184668  | 6.09537687 | 6.76143117  |
| H  | 5.56585939  | 5.64039188 | 7.37035729  |
| C  | 8.13231904  | 7.16290309 | 6.19150294  |
| H  | 8.99278176  | 7.44450845 | 6.40453625  |
| C  | 7.63113541  | 7.39329225 | 4.94551692  |
| H  | 8.15070581  | 7.83887830 | 4.31634714  |
| N  | 6.39587793  | 6.98558768 | 4.61746065  |
| O  | 5.88364947  | 7.30954328 | 3.41470729  |
| O  | 6.03136832  | 7.71622828 | 0.90340002  |
| O  | 7.95521598  | 6.04727741 | 2.33624776  |
| O  | 6.63455169  | 5.18999766 | 0.13620157  |
| C  | 4.90085489  | 5.01896136 | 2.24303744  |
| H  | 4.79850340  | 4.23917015 | 1.69204397  |
| H  | 4.08601616  | 5.52715883 | 2.23168476  |
| H  | 5.09661136  | 4.74993066 | 3.14390672  |
| C  | 7.84820026  | 6.30322008 | 8.53193450  |
| C  | 9.09488849  | 7.06045065 | 10.43505964 |
| H  | 9.66254611  | 7.68489314 | 10.82603850 |
| C  | 8.70018556  | 7.21004914 | 9.13142312  |
| H  | 9.01241909  | 7.93584532 | 8.64056444  |
| C  | 7.42838268  | 5.22498356 | 9.30125369  |
| H  | 6.86519571  | 4.58379001 | 8.93142654  |
| C  | 7.84005744  | 5.10286537 | 10.59444989 |
| H  | 7.54842664  | 4.38156094 | 11.10339619 |
| N  | 8.66014357  | 6.01276603 | 11.14148236 |
| O  | 8.97559746  | 5.92683122 | 12.44802165 |
| Re | 10.53591560 | 4.44867378 | 13.22337116 |
| O  | 9.54310400  | 4.65500130 | 14.58209351 |
| O  | 9.94431262  | 3.51153713 | 11.92292807 |
| O  | 11.90458482 | 3.59513973 | 13.78562221 |
| C  | 11.71358095 | 6.09416024 | 12.69389047 |
| H  | 12.64144338 | 5.87540385 | 12.80948001 |
| H  | 11.48990569 | 6.84231737 | 13.25304423 |
| H  | 11.55148420 | 6.32263179 | 11.77531958 |

### 3d (Figure 4)

|    |             |            |             |
|----|-------------|------------|-------------|
| Re | 1.03760762  | 5.83701893 | 1.28398541  |
| O  | 2.62826773  | 5.26988704 | 1.56344433  |
| O  | 1.10159523  | 6.64399853 | -0.22874707 |
| O  | -0.21093146 | 4.66863641 | 1.13361949  |
| C  | -0.31263726 | 4.76735187 | 4.06788071  |
| H  | -1.07364115 | 4.80893606 | 3.53453698  |
| C  | 1.93113662  | 5.08834651 | 4.35027454  |
| H  | 2.76006721  | 5.33534138 | 4.00960372  |
| C  | 1.85425423  | 4.69300972 | 5.65766163  |
| H  | 2.61379131  | 4.69012061 | 6.19399183  |

|   |             |            |            |
|---|-------------|------------|------------|
| C | -0.44204488 | 4.33259783 | 5.35840481 |
| H | -1.27070004 | 4.06040785 | 5.68113487 |
| N | 0.65064643  | 4.30191352 | 6.16511871 |
| N | 0.86545807  | 5.13760835 | 3.53751447 |
| O | 0.55397310  | 3.88854049 | 7.37686573 |
| C | 0.50680798  | 7.59963107 | 2.32336841 |
| H | 1.21610480  | 7.84384355 | 2.92209358 |
| H | -0.29679966 | 7.44446377 | 2.82604289 |
| H | 0.35894413  | 8.30954650 | 1.69490495 |

## S.5. References

- [1] Batsanov, S. S. Van Der Waals Radii of Elements. *Inorg. Mater.* **2001**, 37 (9), 871–885. <https://doi.org/10.1023/A:1011625728803>.
- [2] C. Adamo, V. Barone, *J. Chem. Phys.* **1999**, 110, 6158-6170.
- [3] F. Weigend, *Phys. Chem. Chem. Phys.* **2006**, 8, 1057-1065.
- [4] S. Grimme, J. Antony, S. Ehrlich, H. Krieg, *J. Chem. Phys.* **2010**, 132, 154104.
- [5] M. J. Frisch, G. W. Trucks, H. B. Schlegel, G. E. Scuseria, M. A. Robb, J. R. Cheeseman, G. Scalmani, V. Barone, G. A. Petersson, H. Nakatsuji, X. Li, M. Caricato, A. V. Marenich, J. Bloino, B. G. Janesko, R. Gomperts, B. Mennucci, H. P. Hratchian, J. V. Ortiz, A. F. Izmaylov, J. L. Sonnenberg, Williams, F. Ding, F. Lipparini, F. Egidi, J. Goings, B. Peng, A. Petrone, T. Henderson, D. Ranasinghe, V. G. Zakrzewski, J. Gao, N. Rega, G. Zheng, W. Liang, M. Hada, M. Ehara, K. Toyota, R. Fukuda, J. Hasegawa, M. Ishida, T. Nakajima, Y. Honda, O. Kitao, H. Nakai, T. Vreven, K. Throssell, J. A. Montgomery Jr., J. E. Peralta, F. Ogliaro, M. J. Bearpark, J. J. Heyd, E. N. Brothers, K. N. Kudin, V. N. Staroverov, T. A. Keith, R. Kobayashi, J. Normand, K. Raghavachari, A. P. Rendell, J. C. Burant, S. S. Iyengar, J. Tomasi, M. Cossi, J. M. Millam, M. Klene, C. Adamo, R. Cammi, J. W. Ochterski, R. L. Martin, K. Morokuma, O. Farkas, J. B. Foresman, D. J. Fox, Wallingford, CT, **2016**.
- [6] S. F. Boys, F. Bernardi, *Mol. Phys.* **1970**, 19, 553-566.
- [7] R. F. W. Bader, *Chem. Rev.* **1991**, 91, 893-928.
- [8] T. A. Keith, TK Gristmill Software, OverlandPark KS, USA **2019**.
- [9] S. J. Grabowski, *J. Mol. Model.* **2013**, 19, 4713–4721
- [10] A. Daolio, A. Pizzi, G. Terraneo, A. Frontera, G. Resnati, A. Daolio, A. Pizzi, G. Terraneo, G. Resnati, A. Frontera, *ChemPhysChem* **2021**, 22, 2281–2285.
- [11] A. Daolio, A. Pizzi, M. Calabrese, G. Terraneo, S. Bordignon, A. Frontera, G. Resnati, *Angew. Chemie - Int. Ed.* **2021**, 60, 20723–20727.
- [12] A. Daolio, A. Pizzi, G. Terraneo, M. Ursini, A. Frontera, G. Resnati, *Angew. Chemie Int. Ed.* **2021**, 60, 14385–14389.
- [13] B. Mallada, A. Gallardo, M. Lamanec, B. de la Torre, V. Špirko, P. Hobza, P. Jelinek, *Science*, **2021**, 374, 863-867.
- [14] J. Contreras-García, E. R. Johnson, S. Keinan, R. Chaudret, J.-P. Piquemal, D. N. Beratan, W. Yang, *J. Chem. Theory Comput.*, **2011**, 7, 625-632.
- [15] E. R. Johnson, S. Keinan, P. Mori-Sánchez, J. Contreras-García, A. J. Cohen, W. Yang, *J. Am. Chem. Soc.*, **2010**, 132, 6498–6506.
